# Supplementary material
Source: MDPI journal article supplement (https://www.mdpi.com/2073-4344/9/11/933)
Supplement: s1 [file s1]

# Supplementary Materials: Effect of Metal Oxide-Support Interactions on Ethylene Oligomerization over Nickel Oxide/Silica-Alumina Catalysts

Ji Sun Yoon, Min Bum Park, Youngmin Kim, Dong Won Hwang, and Ho-Jeong Chae

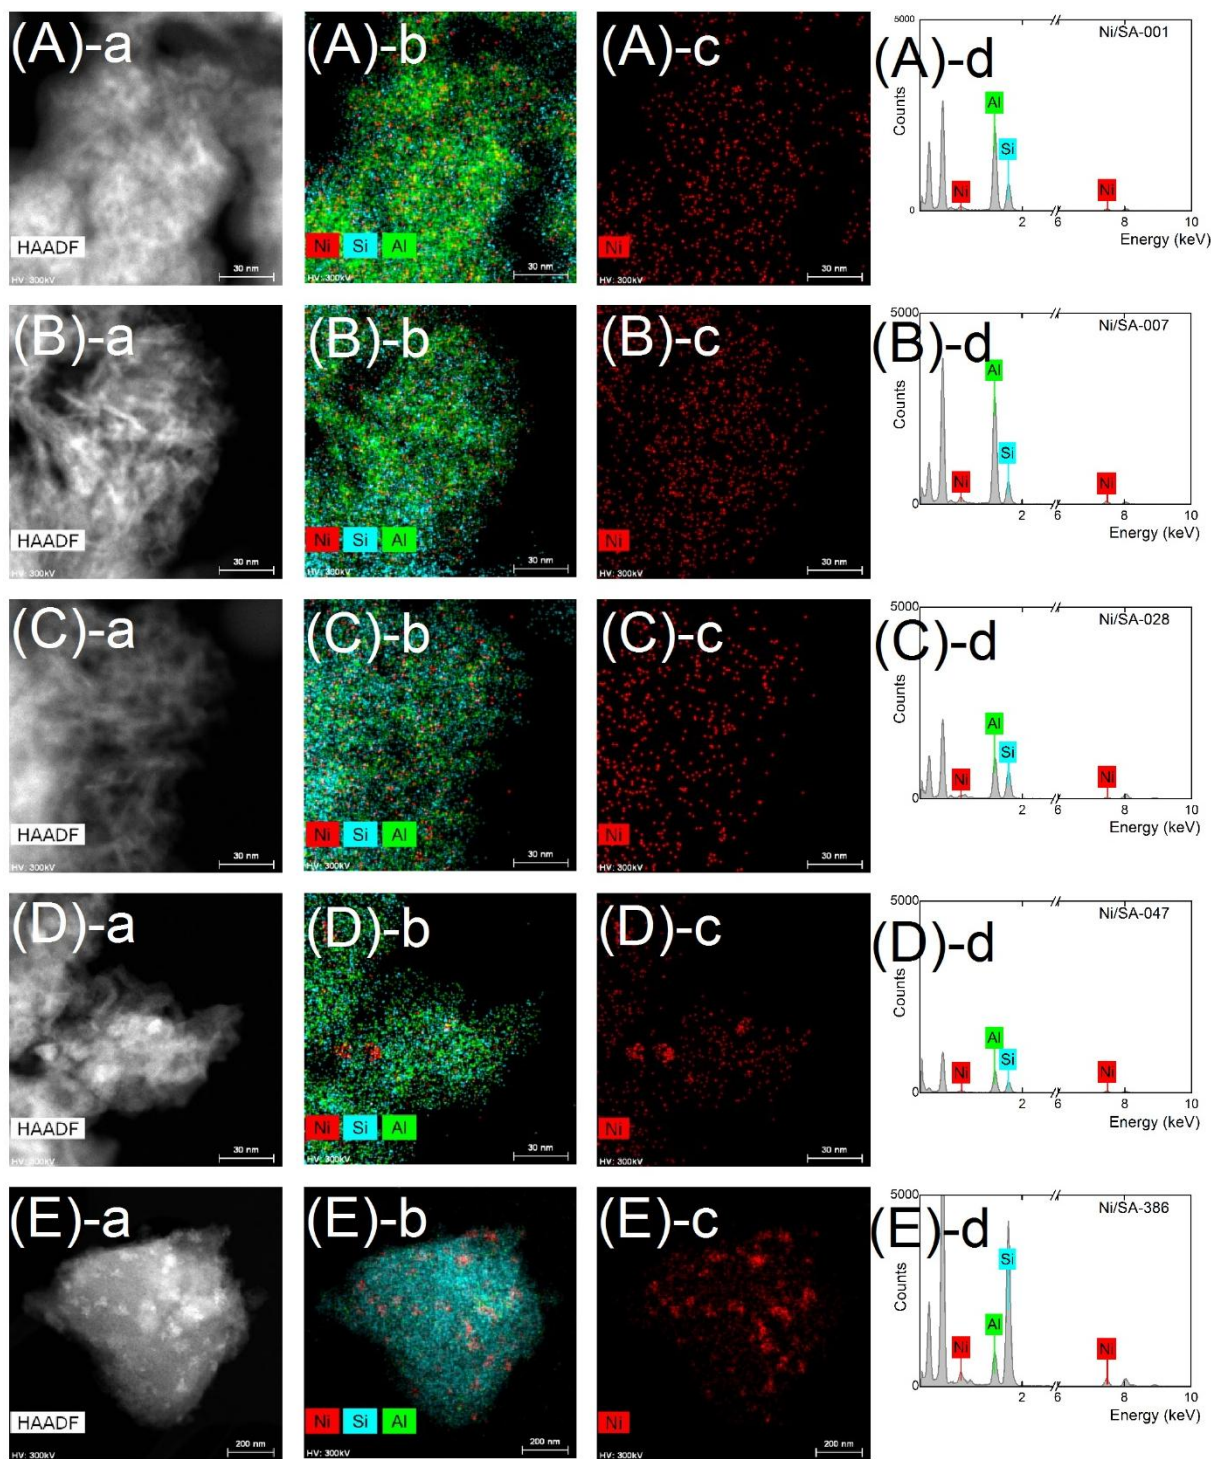

**Figure S1.** (a) HAADF-TEM images, (b,c) EDS maps, and (d) EDS spectra of (A) NiOx/SA-001, (B) NiOx/SA-007, (C) NiOx/SA-028, (D) NiOx/SA-047, and (E) NiOx/SA-386.

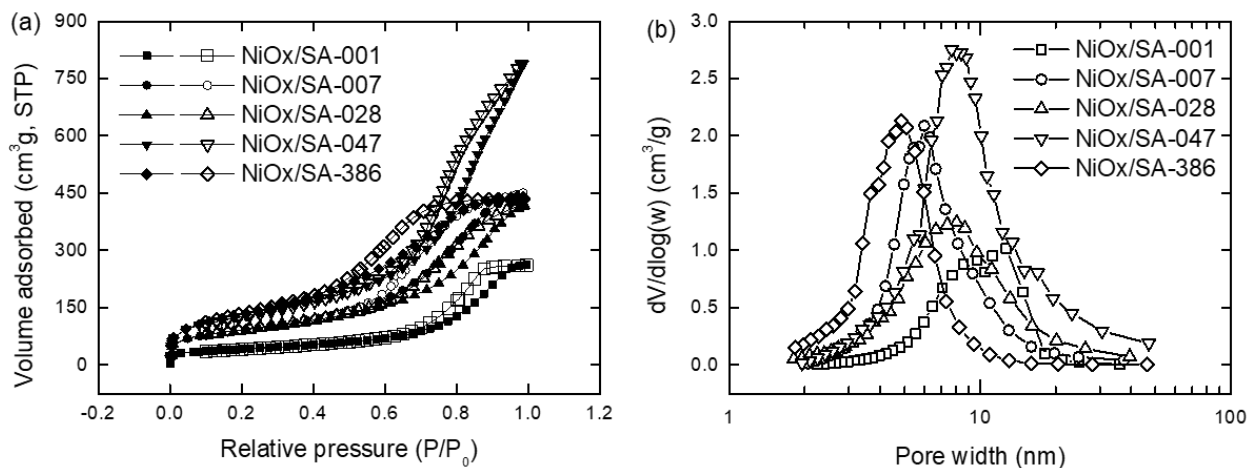

**Figure S2.** (a) N<sub>2</sub> adsorption-desorption isotherms of NiOx/SA-001, -007, -028, -047, and -386 and (b) pore size distribution curves of the corresponding catalysts calculated using the BJH formalism from the N<sub>2</sub> desorption branch isotherm.
